# Supplementary material for: Mapping DNA sequence to transcription factor binding energy in vivo
Source: PubMed Central journal article supplement (PMC6375646; doi:10.1371/journal.pcbi.1006226), 2019-02-04
Supplement: pcbi.1006226.s001.pdf [file pcbi.1006226.s001.pdf]

(A)

Simple *lac* repression construct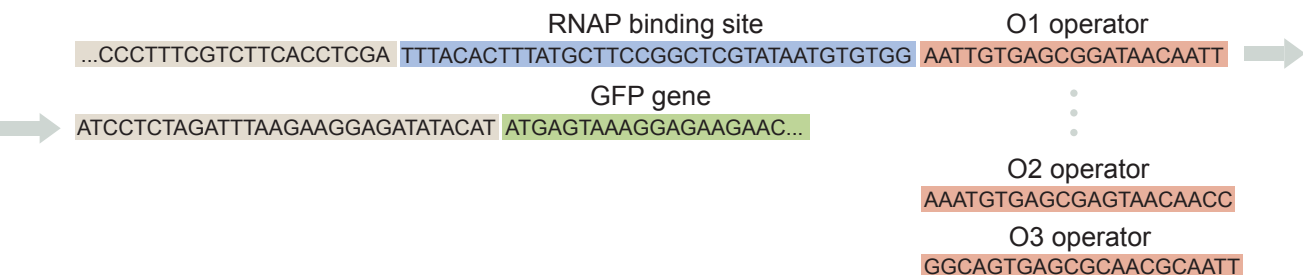Upstream *lac* repression construct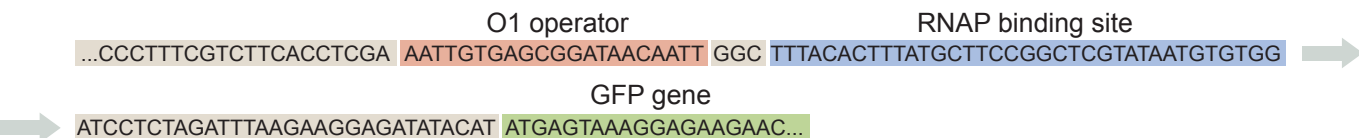Simple *pur* repression construct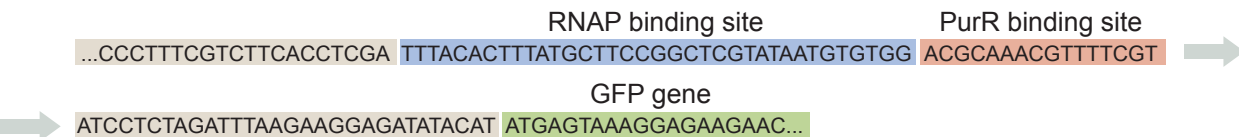

(B)

## Inferred PurR binding site

-35 PurR binding site -10

AAGACAC ACGCAAACGTTTTTCGT TTATACT

## Inferred XylR binding sites

XylR left site XylR right site

AAAAGACATTACGTAA AGCCAT TGTAAAAAATGATAA
