# Supplementary material for: Mapping DNA sequence to transcription factor binding energy in vivo
Source: PubMed Central journal article supplement (PMC6375646; doi:10.1371/journal.pcbi.1006226), 2019-02-04

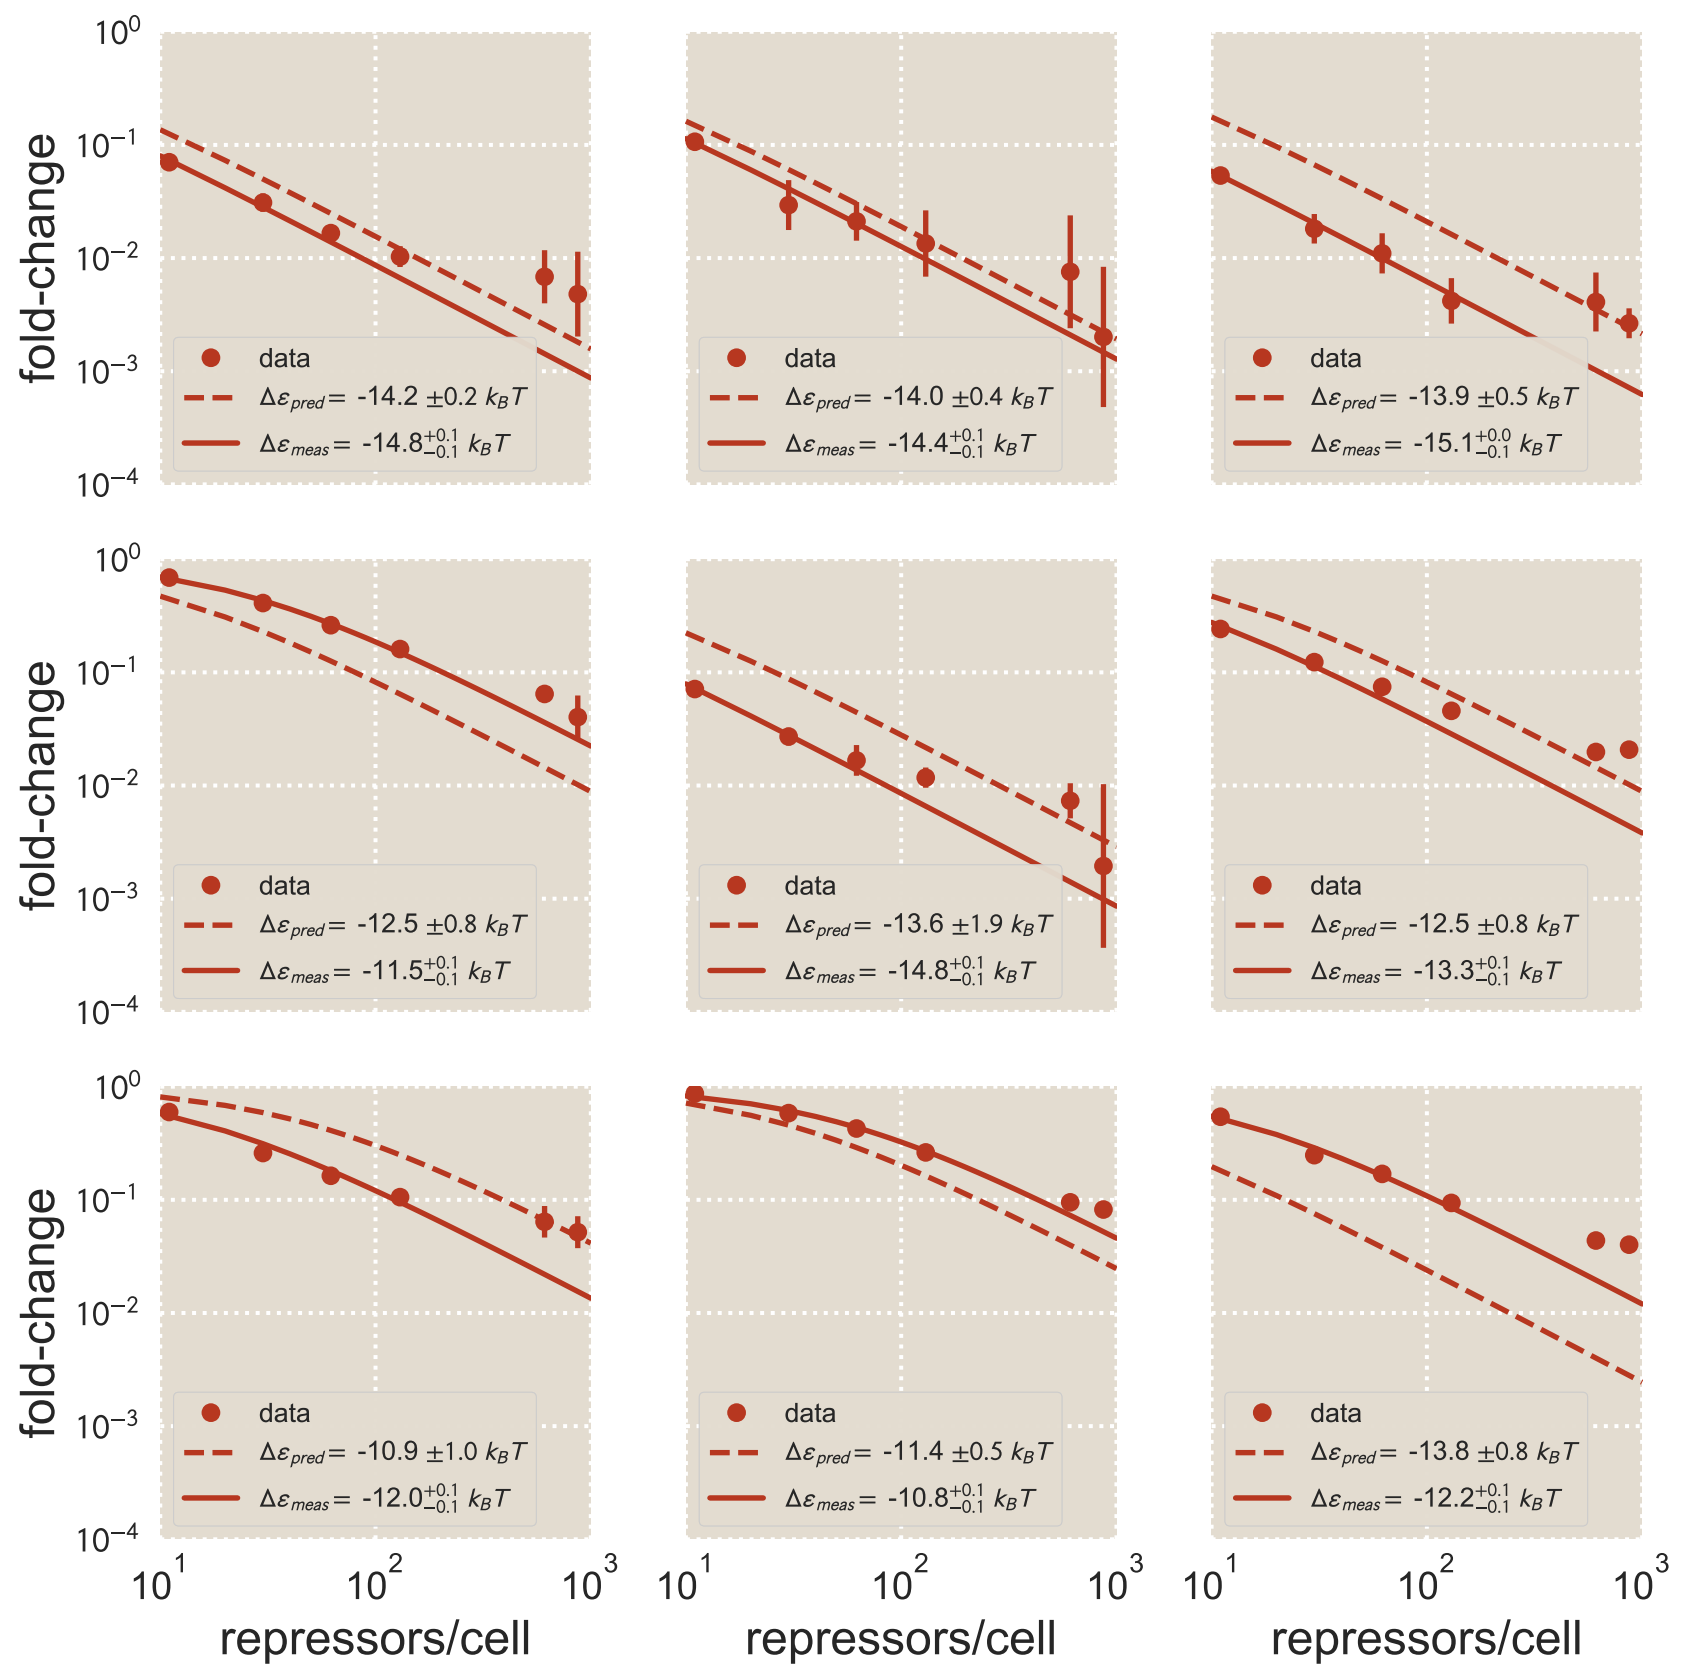

Supplement: pcbi.1006226.s005.pdf [file pcbi.1006226.s005.pdf]
